# Supplementary material for: A Unified Conformational Selection and Induced Fit Approach to Protein-Peptide Docking
Source: PubMed Central journal article supplement (PMC3596317; doi:10.1371/journal.pone.0058769), 2013-03-13

## Supplementary Material

### **A unified conformational selection and induced fit approach to protein-peptide docking**

Mikaël Trellet<sup>1,2</sup>, Adrien SJ Melquiond<sup>1</sup>, Alexandre MJJ Bonvin<sup>1</sup>

<sup>1</sup> *Computational Structural Biology group, Bijvoet Center for Biomolecular Research, Faculty of Science - Chemistry, Utrecht University, 3584 CH Utrecht, The Netherlands*

<sup>2</sup> *Current address: Groupe VENISE, CNRS LIMSI, 91403 Orsay CEDEX, France*

This supplementary material contains three tables and two figures.

**Table A** - Size of the protein interface measured in the different crystal structures (Native interface) and respective size of the surface used to define ambiguous restraints in HADDOCK to drive the modeling (Docking interface). Calculations have been done over the 97 cases successfully docked.

| PDBid   | Native interface (Å <sup>2</sup> ) | Docking interface (Å <sup>2</sup> ) |
|---------|------------------------------------|-------------------------------------|
| 1AWR    | 357                                | 747                                 |
| 1CE1    | 350                                | 918                                 |
| 1CKA    | 432                                | 1092                                |
| 1CZY    | 426                                | 1091                                |
| 1DDV    | 225                                | 635                                 |
| 1DKX    | 472                                | 838                                 |
| 1EG4    | 449                                | 1236                                |
| 1ELW    | 454                                | 1005                                |
| 1ER8    | 684                                | 1230                                |
| 1H6W    | 857                                | 2363                                |
| 1HC9    | 598                                | 1590                                |
| 1I8K    | 503                                | 1267                                |
| 1IAK    | 973                                | 2080                                |
| 1IHJ    | 277                                | 680                                 |
| 1JBU    | 875                                | 2018                                |
| 1JD5    | 398                                | 878                                 |
| 1JWG    | 391                                | 1152                                |
| 1KL3    | 373                                | 829                                 |
| 1KLU    | 938                                | 1967                                |
| 1LVM    | 539                                | 1728                                |
| 1MFG    | 419                                | 1114                                |
| 1MVU    | 423                                | 808                                 |
| 1N12    | 861                                | 2294                                |
| 1N7F    | 440                                | 940                                 |
| 1NLN    | 735                                | 1621                                |
| 1NQ7    | 539                                | 1107                                |
| 1NTV    | 593                                | 1531                                |
| 1NVR    | 300                                | 779                                 |
| 1NX1    | 476                                | 1274                                |
| 1OAI    | 344                                | 928                                 |
| 1OU8    | 449                                | 1193                                |
| 1PZ5    | 516                                | 1164                                |
| 1QKZ    | 472                                | 1154                                |
| 1RXZ    | 581                                | 1709                                |
| 1SE0    | 376                                | 944                                 |
| 1SFI    | 615                                | 1215                                |
| 1SSH    | 416                                | 1143                                |
| 1SVZ    | 471                                | 1150                                |
| 1T4F    | 463                                | 1070                                |
| 1T7R    | 463                                | 953                                 |
| 1TP5    | 411                                | 1009                                |
| 1TW6    | 338                                | 877                                 |
| 1U00    | 595                                | 1234                                |
| 1U8I    | 450                                | 1077                                |
| 1U9L    | 622                                | 1185                                |
| 1UJ0    | 381                                | 1096                                |
| 1VZQ    | 380                                | 885                                 |
| 1W9E    | 413                                | 741                                 |
| 1X2R    | 444                                | 1040                                |
| 1YMT    | 429                                | 905                                 |
| 1YPH    | 511                                | 1234                                |
| 1YUC    | 569                                | 1167                                |
| 1YWO    | 379                                | 943                                 |
| 1Z9O    | 673                                | 1974                                |
| 1ZUK    | 735                                | 1495                                |
| 2A3I    | 492                                | 957                                 |
| 2AI4    | 540                                | 1560                                |
| 2AK5    | 365                                | 754                                 |
| 2B1Z    | 477                                | 768                                 |
| 2B9H    | 582                                | 1312                                |
| 2BBA    | 660                                | 1319                                |
| 2C3I    | 481                                | 943                                 |
| 2CCH    | 610                                | 1099                                |
| 2D0N    | 375                                | 894                                 |
| 2DS8    | 347                                | 1184                                |
| 2DZE    | 702                                | 1574                                |
| 2FGR    | 354                                | 907                                 |
| 2FNT    | 596                                | 1476                                |
| 2FOJ    | 322                                | 958                                 |
| 2FVJ    | 481                                | 920                                 |
| 2H9M    | 340                                | 535                                 |
| 2HO2    | 246                                | 591                                 |
| 2HPL    | 290                                | 803                                 |
| 2IPU    | 487                                | 1037                                |
| 2IV9    | 565                                | 1258                                |
| 2J6F    | 423                                | 1069                                |
| 2JAM    | 350                                | 880                                 |
| 2O02    | 786                                | 1872                                |
| 2O4J    | 506                                | 961                                 |
| 2O9V    | 358                                | 759                                 |
| 2OTU    | 755                                | 1494                                |
| 2P0W    | 739                                | 1379                                |
| 2P1K    | 556                                | 1541                                |
| 2P1T    | 503                                | 1313                                |
| 2P54    | 571                                | 1237                                |
| 2PUY    | 483                                | 1460                                |
| 2PV2    | 978                                | 2156                                |
| 2QOS    | 680                                | 1150                                |
| 2R7G    | 755                                | 1810                                |
| 2V3S    | 324                                | 835                                 |
| 2ZJD    | 584                                | 1205                                |
| 3BFQ    | 1008                               | 2470                                |
| 3BU3    | 907                                | 2224                                |
| 3BWA    | 624                                | 1302                                |
| 3CVP    | 417                                | 781                                 |
| 3D1E    | 412                                | 1238                                |
| 3D9T    | 308                                | 810                                 |
| average | 517                                | 1207                                |

**Table B** - Interface-RMSD between bound and unbound forms of the proteins and i-RMSD between the closest model generated by HADDOCK and the bound form of the protein for each case.

| PDBid       | i-RMSD bound vs unbound (Å) | i-RMSD bound vs best model (Å) |             |      |      |             |      |      |             |       |      |
|-------------|-----------------------------|--------------------------------|-------------|------|------|-------------|------|------|-------------|-------|------|
| <b>1AWR</b> | 0.30                        | 0.77                           | <b>1KLU</b> | 0.33 | 1.59 | <b>1VZQ</b> | 1.77 | 2.27 | <b>2HPL</b> | 0.23  | 1.10 |
| <b>1CE1</b> | 1.88                        | 2.53                           | <b>1LVM</b> | 0.47 | 0.93 | <b>1W9E</b> | 0.56 | 0.86 | <b>2IPU</b> | 2.30  | 3.03 |
| <b>1CKA</b> | 1.48                        | 1.94                           | <b>1MFG</b> | 0.67 | 1.26 | <b>1X2R</b> | 0.26 | 1.37 | <b>2J6F</b> | 0.29  | 0.96 |
| <b>1CZY</b> | 0.27                        | 0.93                           | <b>1N7F</b> | 0.40 | 0.91 | <b>1YWO</b> | 0.35 | 2.03 | <b>2O02</b> | 0.55  | 1.60 |
| <b>1D4T</b> | 1.60                        | 1.56                           | <b>1NQ7</b> | 0.98 | 1.05 | <b>2A3I</b> | 0.29 | 1.74 | <b>2O4J</b> | 0.45  | 1.98 |
| <b>1DDV</b> | 0.81                        | 1.78                           | <b>1NVR</b> | 0.23 | 1.64 | <b>2AK5</b> | 0.54 | 1.00 | <b>2O9V</b> | 0.31  | 1.85 |
| <b>1EG4</b> | 0.94                        | 9.53                           | <b>1NX1</b> | 0.93 | 1.08 | <b>2B1Z</b> | 4.25 | 6.58 | <b>2P1T</b> | 11.48 | 8.77 |
| <b>1ER8</b> | 0.24                        | 1.24                           | <b>1OAI</b> | 1.49 | 2.35 | <b>2B9H</b> | 0.32 | 1.85 | <b>2P54</b> | 0.73  | 1.73 |
| <b>1GYB</b> | 0.15                        | 5.04                           | <b>1OU8</b> | 0.61 | 1.54 | <b>2C3I</b> | 0.20 | 1.20 | <b>2PUY</b> | 1.06  | 3.00 |
| <b>1HC9</b> | 3.50                        | 4.50                           | <b>1PZ5</b> | 0.32 | 1.44 | <b>2CCH</b> | 0.24 | 1.84 | <b>2QOS</b> | 0.90  | 2.36 |
| <b>1JD5</b> | 4.15                        | 5.84                           | <b>1RXZ</b> | 1.47 | 1.79 | <b>2DS8</b> | 0.58 | 0.96 | <b>2R7G</b> | 1.20  | 1.62 |
| <b>1JWG</b> | 0.45                        | 1.11                           | <b>1SE0</b> | 0.28 | 1.03 | <b>2FGR</b> | 0.28 | 1.84 | <b>2VJ0</b> | 3.41  | 3.98 |
| <b>1KL3</b> | 1.59                        | 2.61                           | <b>1SFI</b> | 0.24 | 2.75 | <b>2FNT</b> | 0.60 | 1.45 | <b>2ZJD</b> | 1.11  | 2.11 |
|             |                             |                                | <b>1T4F</b> | 1.50 | 1.72 | <b>2FOJ</b> | 0.28 | 1.15 | <b>3D1E</b> | 0.38  | 1.02 |
|             |                             |                                | <b>1T7R</b> | 0.41 | 1.10 | <b>2FVJ</b> | 0.31 | 1.43 | <b>3D9T</b> | 2.71  | 3.55 |
|             |                             |                                | <b>1TP5</b> | 0.49 | 0.88 | <b>2H9M</b> | 2.09 | 4.09 |             |       |      |
|             |                             |                                | <b>1TW6</b> | 0.13 | 0.64 | <b>2HO2</b> | 0.55 | 1.83 |             |       |      |

**Table C** - List of protein-peptide complexes identifiers with their corresponding free forms when available. In red, the new entries added to PeptiDB in this study.

| PDBid complex | PDBid free protein |
|---------------|--------------------|
| 1AWR          | 2ALF:A             |
| 1CE1          | <b>1UM5</b>        |
| 1CKA          | 2DVJ:A             |
| 1CZY          | 1CZZ:C             |
| 1D4T          | <b>1D1Z:C</b>      |
| 1DDV          | 1I2H:A             |
| 1DKX          | -                  |
| 1EG4          | 1EG3:A             |
| 1ELW          | -                  |
| 1ER8          | 1OEW:A             |
| 1GYB          | 1GY7:B             |
| 1H6W          | -                  |
| 1HC9          | <b>2ABX:A</b>      |
| 1I8K          | -                  |
| 1IAK          | -                  |
| 1IHJ          | -                  |
| 1JBU          | 2BZ6:H             |
| 1JD5          | 1QBH:A             |
| 1JWG          | <b>1JWF:A</b>      |
| 1KL3          | 2RTM:A             |
| 1KLU          | <b>1PYW:AB</b>     |
| 1LVM          | 1LVB:B             |
| 1MFG          | 2H3L:A             |
| 1MVU          | -                  |
| 1N12          | -                  |

|      |                |
|------|----------------|
| 1N7F | 1N7E:A         |
| 1NLN | -              |
| 1NQ7 | 1N83:A         |
| 1NTV | -              |
| 1NVR | 2QHN:A         |
| 1NX1 | 1ALV:A         |
| 1OAI | 1G05:A         |
| 1OU8 | 1OU9:A         |
| 1PZ5 | <b>1M7D:AB</b> |
| 1QKZ | -              |
| 1RXZ | 1RWZ:A         |
| 1SE0 | <b>3SIQ :A</b> |
| 1SFI | 1UTN:A         |
| 1SSH | 1OOT:A         |
| 1SVZ | -              |
| 1T4F | 1Z1M:A         |
| 1T7R | 2AM9:A         |
| 1TP5 | <b>1TQ3:A</b>  |
| 1TW6 | <b>2I3I :A</b> |
| 1U00 | -              |
| 1U8I | -              |
| 1U9L | -              |
| 1UJ0 | -              |
| 1VZQ | 1JWT:A         |
| 1W9E | 1R6J:A         |
| 1X2R | 1X2J:A         |
| 1XOC | -              |
| 1YMT | -              |

|      |                |
|------|----------------|
| 1YPH | -              |
| 1YUC | <b>3TX7:B</b>  |
| 1YWO | 1Y-M:A         |
| 1Z9O | <b>1Z9L:A</b>  |
| 1ZUK | -              |
| 2A3I | 2AA2:A         |
| 2AI4 | -              |
| 2AK5 | 2G6F:X         |
| 2B1Z | <b>2IOG:A</b>  |
| 2B9H | 2B9F:A         |
| 2BBA | -              |
| 2C3I | 2J2I:B         |
| 2CCH | 1H1R:B         |
| 2D0N | -              |
| 2D5W | -              |
| 2DS8 | 2DS7:A         |
| 2DZE | -              |
| 2FGR | 2FGQ:X         |
| 2FMF | 1JBE:A         |
| 2FNT | <b>3HAU</b>    |
| 2FOJ | 2F1W:A         |
| 2FVJ | 2HWQ:A         |
| 2H9M | 2H14:A         |
| 2HO2 | 2E45:A         |
| 2HPL | 2HPJ:A         |
| 2IPU | <b>1YEJ:HL</b> |
| 2IV9 | <b>1E42:AB</b> |
| 2J6F | <b>2J6K:A</b>  |

|      |               |
|------|---------------|
| 2JAM | -             |
| 2O02 | <b>3RDH:A</b> |
| 2O4J | 1IE9:A        |
| 2O9V | 2O9S:A        |
| 2OTU | -             |
| 2P0W | -             |
| 2P1K | -             |
| 2P1T | <b>3NSQ:A</b> |
| 2P54 | 1I7G:A        |
| 2PUY | <b>2YQL:A</b> |
| 2PV2 | -             |
| 2QOS | 1LF7:A        |
| 2R7G | <b>3POM:A</b> |
| 2V3S | -             |
| 2VJ0 | 1B9K:A        |
| 2ZJD | 1V49:A        |
| 3BFQ | -             |
| 3BU3 | <b>3EKK:A</b> |
| 3BWA | -             |
| 3CVP | -             |
| 3D1E | 3D1G:A        |
| 3D9T | 1QBH:A        |

**Figure A.** Success rate (% of benchmark cases with acceptable models) as a function of the ligand-interface RMSD cutoff. In this analysis, a docking run is defined as successful if at least one acceptable model (as defined by the l-i-RMSD cutoff) is generated among the 400 water-refined models.

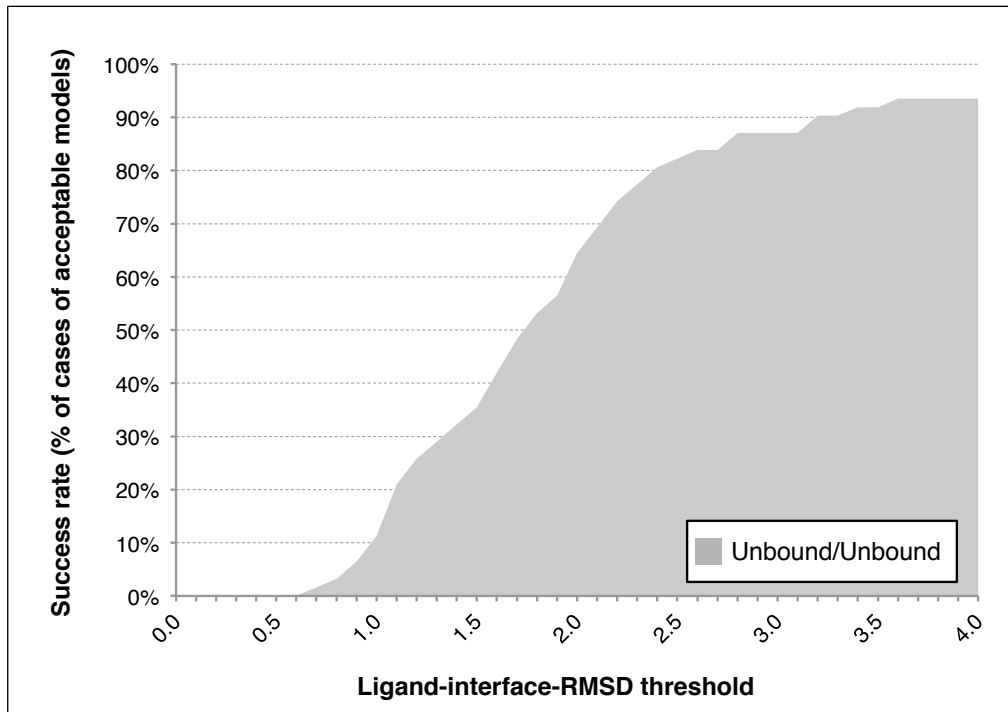

**Figure B -** Bound/bound docking performance using the default HADDOCK protocol. The percentages of near-native and sub-angstrom resolution models (see Methods) at the various stages (rigid-body - *it0*, semi-flexible - *it1* and water refinement - *water*) are reported in the left panels. The right panels show the percentages after water refinement as a function of the docking difficulty level.

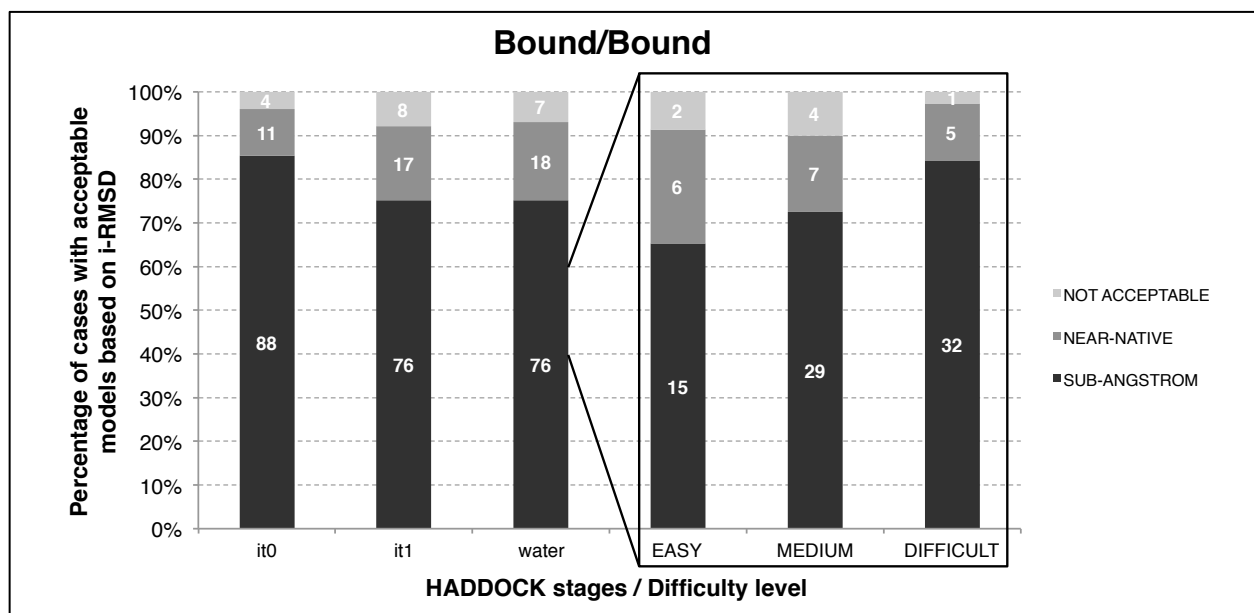

Supplement: pone.0058769.s001.pdf [file pone.0058769.s001.pdf]
